# Supplementary material for: Invasive Salmonella exploits divergent immune evasion strategies in infected and bystander dendritic cell subsets
Source: PubMed Central journal article supplement (PMC6242960; doi:10.1038/s41467-018-07329-0), 2018-11-19
Supplement: 41467_2018_7329_MOESM3_ESM.pdf [file 41467_2018_7329_MOESM3_ESM.pdf]

## Description of Additional Supplementary Files

### Supplementary Data 1

Description: Description of the single cell RNA-sequencing metadata.

### Supplementary Data 2

Description: Tables of Monocle2 differential gene expression analyses. **A** Differential expression results between *Salmonella*-challenged cells collected at 2h and 6h p.i. using the *differentialGeneTest* function. **B** Differential gene expression results for the identification of genes that change as a function of the computed pseudotime using the *differentialGeneTest* function.

### Supplementary Data 3

Description: Gene Ontology analysis of the three gene modules identified by pseudotime analysis and k-means clustering.

### Supplementary Data 4

Description: Differential expression results using *scde* to identify marker genes for each unsupervised cluster. Marker genes were identified by comparing single cells from each unsupervised cluster compared to all other cells at the same time point.

### Supplementary Data 5

Description: Gene Ontology analysis of marker genes identified for each unsupervised cluster.

### Supplementary Data 6

Description: Differential expression results using *scde* to directly compare experimental groups of cells.

### Supplementary Data 7

Description: Differential expression results using *scde* for genes identified as differentially expressed in either STM-LT2, STM-D23580, or both conditions.

### Supplementary Data 8

Description: Gene Ontology analysis of differentially expressed genes identified from direct comparison of experimental groups of cells.

### Supplementary Data 9

Description: Differential expression results using *DESeq2* to directly compare experimental groups of small bulks.
